# Supplementary material for: Comparison of Computed Tomography derived Fractional Flow Reserve to invasive Fractional Flow Reserve in Diagnosis of Functional Coronary Stenosis: A Meta-Analysis
Source: PubMed Central journal article supplement (PMC6070545; doi:10.1038/s41598-018-29910-9), 2018-08-01

## **Supplementary material**

### **Comparison of Computed Tomography derived Fractional Flow Reserve to invasive Fractional Flow Reserve in Diagnosis of Functional Coronary Stenosis: A Meta-Analysis.**

Pradyumna Agasthi, MD<sup>1</sup>,

Arun Kanmanthareddy, MD<sup>2</sup>,

Charl Khalil, MD<sup>1</sup>

Obiora Egbuche, MD<sup>3</sup>,

Vivek Yarlagadda, MD<sup>4</sup>,

Rajesh Sachdeva, MD<sup>3</sup>.

Reza Arsanjani, MD<sup>1</sup>

**Table S1: Baseline Characteristics**

| Author       | Year | Number of Patients | Age (Yrs) (Mean $\pm$ SD) |       | Male % | Smoking % | Diabetes % | Hypertension % | Dyslipidemia % |
|--------------|------|--------------------|---------------------------|-------|--------|-----------|------------|----------------|----------------|
|              |      |                    | Mean                      | SD    |        |           |            |                |                |
| Koo[14]      | 2011 | 103                | 62.7                      | 9     | 72     | 36        | 26         | 65             | 65             |
| Min[18]      | 2012 | 252                | 62.9                      | 9     | 71     | 17.5      | 21.2       | 71.2           | 79.8           |
| Norgaard[19] | 2014 | 254                | 64                        | 10    | 64     | 18        | 23         | 69             | 79             |
| Kim[20]      | 2014 | 44                 | 65                        | 9     | 80     |           | 29         | 81             | 63             |
| Renker[21]   | 2014 | 53                 | 61.2                      | 12    | 64     | 14        | 32         | 54             | 54             |
| Coenen[22]   | 2015 | 106                | 61.4                      | 9     | 77     | 25        | 19         | 59             | 63             |
| De Geer[23]  | 2015 | 21                 | 60                        | 40-74 | 52.4   | 57.14     | 14.28      |                |                |
| Kruk[24]     | 2016 | 90                 | 63.4                      | 8     | 32     | 20.2      | 14.4       | 87.8           | 90             |
| Zhang[25]    | 2016 | 21                 | 52                        | 10    | 76     | 10        | 10         | 52             | 62             |
| Gaur[26]     | 2017 | 60                 | 61                        | 10    | 83     | 65        | 10         | 35             | 28             |
| Kawaji[27]   | 2017 | 43                 | 70.8                      | 8     | 65     | 10        | 35         | 54             | 73             |
| Ko[28]       | 2017 | 30                 | 60                        | 9     | 70     | 60        | 30         | 73.3           | 80             |
| Kurata[29]   | 2017 | 21                 | 69.6                      | 9     | 76     | 43        | 33         | 71             | 38             |
| Osawa[30]    | 2017 | 20                 | 73                        | 8     | 80     | 15        | 80         | 80             | 50             |
| Packard[31]  | 2017 | 75                 | 66                        | 10    | 75     | 47        | 11         | 55             | 79             |
| Shi[32]      | 2017 | 29                 | 68.1                      | 8     | 55.2   | 44.8      | 41.4       | 72.4           | 65.5           |
| Yang[33]     | 2017 | 72                 | 62.7                      | 9     | 89     | -         | -          | -              | -              |



**Table S3: Individual study estimates of diagnostic accuracy of FFRCT for detection of ischemia-causing lesions on a per-vessel basis**

| Author       | TP  | FP | FN | TN  | Sensitivity % | 95% CI        | Specificity % | 95% CI        |
|--------------|-----|----|----|-----|---------------|---------------|---------------|---------------|
| Koo[14]      | 51  | 18 | 7  | 83  | 87.93         | 76.7 – 95.0   | 82.18         | 73.30 – 89.08 |
| Min[18]      | 121 | 96 | 30 | 160 | 80.13         | 72.87 – 86.18 | 62.5          | 56.26 - 68.45 |
| Norgaard[19] | 84  | 51 | 16 | 333 | 84            | 75.32 – 90.57 | 86.72         | 82.91 - 89.95 |
| Kim[20]      | 29  | 6  | 5  | 8   | 85.29         | 68.94 – 95.05 | 57.14         | 28.86 – 82.34 |
| Renker[21]   | 17  | 7  | 3  | 40  | 85            | 62.11 – 96.79 | 85.11         | 71.69 – 93.80 |
| Coenen[22]   | 70  | 38 | 10 | 71  | 87.5          | 78.21 – 93.84 | 65.14         | 55.42 – 74.01 |
| De Geer[23]  | 5   | 4  | 1  | 13  | 83.33         | 35.88 – 99.58 | 76.47         | 50.10– 93.19  |
| Kruk[24]     | 31  | 15 | 10 | 40  | 75.61         | 59.70 – 87.64 | 72.73         | 59.04 –83.86  |
| Zhang[25]    | 8   | 1  | 2  | 21  | 80            | 44.39 – 97.48 | 95.45         | 77.16 – 99.88 |
| Gaur[26]     | 35  | 28 | 7  | 54  | 83.33         | 68.64 – 93.03 | 65.85         | 54.55 – 75.97 |
| Kawaji[27]   | 26  | 20 | 2  | 22  | 92.86         | 76.50 – 99.12 | 52.338        | 36.42 – 68    |
| Ko[28]       | 14  | 5  | 4  | 33  | 77.78         | 52.36 – 93.59 | 86.84         | 71.91 – 95.59 |
| Kurata[29]   | 14  | 2  | 0  | 13  | 100           | 76.84 – 100   | 86.67         | 69.54 – 98.34 |
| Osawa[30]    | 10  | 5  | 0  | 11  | 100           | 69.15 – 100   | 68.75         | 41.34 – 88.98 |
| Packard[31]  | 66  | 18 | 3  | 120 | 95.65         | 87.82 – 99    | 86.96         | 80.17 – 92.08 |
| Shi[32]      | 16  | 6  | 1  | 13  | 94.12         | 71.31 – 99.85 | 68.42         | 43.35 – 87.42 |
| Yang[33]     | 47  | 19 | 7  | 65  | 87            | 75.1 – 94.6   | 77.38         | 66.95 – 85.8  |

**Table S4: Additional covariates used for meta-regression analysis.**

| Author                 | Study design                | Sample Size | Year | Location of publication | Quality  | CT-FFR appraisal                                                                 | Prevalence of Coronary Artery Disease (%) |
|------------------------|-----------------------------|-------------|------|-------------------------|----------|----------------------------------------------------------------------------------|-------------------------------------------|
| Koo <sup>14</sup>      | Multicenter prospective     | >100        | 2011 | Asia, America           | High     | FFR-CT core laboratory (HeartFlow, Inc. Redwood City, California, United States) | 36.5                                      |
| Min <sup>18</sup>      | Multicenter prospective     | >100        | 2012 | Asia, America, Europe   | High     | FFR-CT core laboratory (HeartFlow, Inc. Redwood City, California, United States) | 54.4                                      |
| Norgaard <sup>19</sup> | Multicenter prospective     | >100        | 2014 | Asia, Europe, Australia | High     | FFR-CT core laboratory (HeartFlow, Inc. Redwood City, California, United States) | 32                                        |
| Kim <sup>20</sup>      | Multicenter retrospective   | <100        | 2014 | Asia, America, Europe   | High     | FFR-CT core laboratory (HeartFlow, Inc. Redwood City, California, United States) | 100                                       |
| Renker <sup>21</sup>   | Single-center retrospective | <100        | 2014 | America                 | High     | Siemens cFFR, version 1.4; (Siemens Healthcare Forchheim, Germany)               | 30                                        |
| Coenen <sup>22</sup>   | Single-center retrospective | >100        | 2015 | Europe                  | High     | Siemens cFFR, version 1.4; (Siemens Healthcare Forchheim, Germany)               | 42                                        |
| De Geer <sup>23</sup>  | Single-center retrospective | <100        | 2015 | Europe                  | Moderate | Siemens cFFR, version 1.4; (Siemens Healthcare Forchheim, Germany)               | 28.6                                      |
| Kruk <sup>24</sup>     | Single-center Prospective   | <100        | 2016 | Europe                  | High     | Siemens cFFR, version 1.4; (Siemens Healthcare Forchheim, Germany)               | 42.7                                      |

|                       |                             |      |      |           |          |                                                                                  |      |
|-----------------------|-----------------------------|------|------|-----------|----------|----------------------------------------------------------------------------------|------|
| Zhang <sup>25</sup>   | Single-center Retrospective | <100 | 2016 | Asia      | High     | ANSYS FLUENT (Canonsburg, Pennsylvania, United States)                           | 47.6 |
| Gaur <sup>26</sup>    | Single-center Prospective   | <100 | 2017 | Europe    | Moderate | FFR-CT core laboratory (HeartFlow, Inc. Redwood City, California, United States) | 58%  |
| Kawaji <sup>27</sup>  | Single-center Prospective   | <100 | 2017 | Asia      | High     | FFR-CT core laboratory (HeartFlow, Inc. Redwood City, California, United States) | 49%  |
| Ko <sup>28</sup>      | Single-center Prospective   | <100 | 2017 | Australia | Moderate | CTFFR software (Toshiba Medical Systems Corporation, Otawara, Japan)             | 46.7 |
| Kurata <sup>29</sup>  | Single-center Retrospective | <100 | 2017 | Asia      | Moderate | Siemens cFFR, version 1.4; (Siemens Healthcare Forchheim, Germany)               | 48.3 |
| Osawa <sup>30</sup>   | Single-center Prospective   | <100 | 2017 | Asia      | Moderate | FFR-CT core laboratory (HeartFlow, Inc. Redwood City, California, United States) | 45   |
| Packard <sup>31</sup> | Single-center Retrospective | <100 | 2017 | America   | Moderate | FFR-CT core laboratory (HeartFlow, Inc. Redwood City, California, United States) | 33   |
| Shi <sup>32</sup>     | Single-center Retrospective | <100 | 2017 | Asia      | High     | COMSOL Multiphysics software (COMSOL AB, Stockholm, Sweden),                     | 47.2 |
| Yang <sup>33</sup>    | Single-center Prospective   | <100 | 2017 | Asia      | Moderate | Siemens cFFR, version 1.4; (Siemens Healthcare Forchheim, Germany)               | 39   |

**Table S5: Results of Meta-regression analysis**

| Meta-regression analysis per-patient      |                             |                 |         |
|-------------------------------------------|-----------------------------|-----------------|---------|
| Covariates                                | Meta-regression coefficient | 95% CI          | p-value |
| Study Design                              | 1.567                       | (-1.819, 4.953) | 0.3644  |
| Sample size                               | -0.527                      | (-2.555, 1.501) | 0.8358  |
| Year of publication                       | -0.196                      | (-0.843, 0.451) | 0.5527  |
| Region (Asia vs Others)                   | 0.826                       | (-1.643, 3.295) | 0.5120  |
| Quality                                   | 1.028                       | (-2.088, 4.145) | 0.5179  |
| CT-FFR appraisal (Siemens cFFR vs Others) | -0.236                      | (-2.470, 1.997) | 0.5100  |
| Prevalence of CAD                         | 0.048                       | (-0.019, 0.114) | 0.1597  |
| Hypertension                              | 0.025                       | (-0.146, 0.195) | 0.7791  |
| Diabetes                                  | -0.119                      | (-0.245, 0.006) | 0.0630  |
| Smokers                                   | 0.059                       | (-0.052, 0.171) | 0.2966  |
| Dyslipidemia                              | -0.039                      | (-0.234, 0.135) | 0.6581  |
| Meta-regression analysis per-vessel       |                             |                 |         |
| Covariates                                | Meta-regression coefficient | 95% CI          | p-value |
| Study Design                              | 0.402                       | (-2.611, 3.415) | 0.7937  |
| Sample size                               | -0.251                      | (-2.162, 1.661) | 0.7971  |
| Year of publication                       | -0.016                      | (-0.505, 0.473) | 0.9491  |
| Region (Asia vs Others)                   | -0.289                      | (-1.446, 0.869) | 0.6250  |
| Quality                                   | 0.606                       | (-0.553, 1.764) | 0.3053  |
| CT-FFR appraisal (Siemens cFFR vs Others) | 0.188                       | (-1.045, 1.242) | 0.7664  |
| Prevalence of CAD                         | 0.026                       | (-0.004, 0.056) | 0.0843  |
| Hypertension                              | 0.047                       | (-0.005, 0.099) | 0.0770  |
| Diabetes                                  | -0.028                      | (-0.069, 0.013) | 0.1860  |
| Smokers                                   | -0.001                      | (-0.028, 0.026) | 0.9291  |
| Dyslipidemia                              | -0.026                      | (-0.069, 0.017) | 0.2280  |

Figure S1. QUADAS-2 Results

| Study    | Risk of Bias      |            |                    |                 | Applicability Concerns |            |                    |
|----------|-------------------|------------|--------------------|-----------------|------------------------|------------|--------------------|
|          | Patient Selection | Index Test | Reference Standard | Flow and Timing | Patient Selection      | Index Test | Reference Standard |
| Koo      | 😊                 | 😊          | 😊                  | 😊               | 😊                      | 😊          | 😊                  |
| Min      | 😊                 | 😊          | 😊                  | 😊               | 😊                      | 😊          | 😊                  |
| Norgaard | 😊                 | 😊          | 😊                  | ?               | 😊                      | 😊          | 😊                  |
| Kim      | 😊                 | 😊          | 😊                  | ?               | 😊                      | 😊          | 😊                  |
| Renker   | 😊                 | 😊          | 😊                  | ?               | 😊                      | 😊          | 😊                  |
| Coenen   | 😊                 | 😊          | 😊                  | 😊               | 😊                      | 😊          | 😊                  |
| De Geer  | 😞                 | 😊          | 😊                  | ?               | ?                      | 😊          | 😊                  |
| Kruk     | 😊                 | 😊          | 😊                  | ?               | 😊                      | 😊          | 😊                  |
| Zhang    | 😊                 | 😊          | 😊                  | ?               | 😊                      | 😊          | 😊                  |
| Gaur     | 😊                 | 😊          | 😊                  | 😊               | 😞                      | 😊          | 😊                  |
| Kawaji   | 😊                 | 😊          | 😊                  | ?               | 😊                      | 😊          | 😊                  |
| Ko       | 😞                 | 😊          | 😊                  | ?               | 😞                      | 😊          | 😊                  |
| Kurata   | 😊                 | 😊          | 😊                  | 😊               | 😞                      | 😊          | 😊                  |
| Osawa    | 😞                 | 😊          | 😊                  | 😊               | 😞                      | 😊          | 😊                  |
| Packard  | 😞                 | 😊          | 😊                  | 😞               | 😞                      | 😊          | 😊                  |
| Shi      | 😊                 | 😊          | 😊                  | 😊               | 😊                      | 😊          | 😊                  |
| Yang     | 😊                 | 😊          | 😊                  | ?               | 😊                      | 😊          | 😊                  |

😊 Low Risk

😞 High Risk

? Unclear Risk



Figure S2 : QUADAS 2 DOMAIN- Graph for Bias

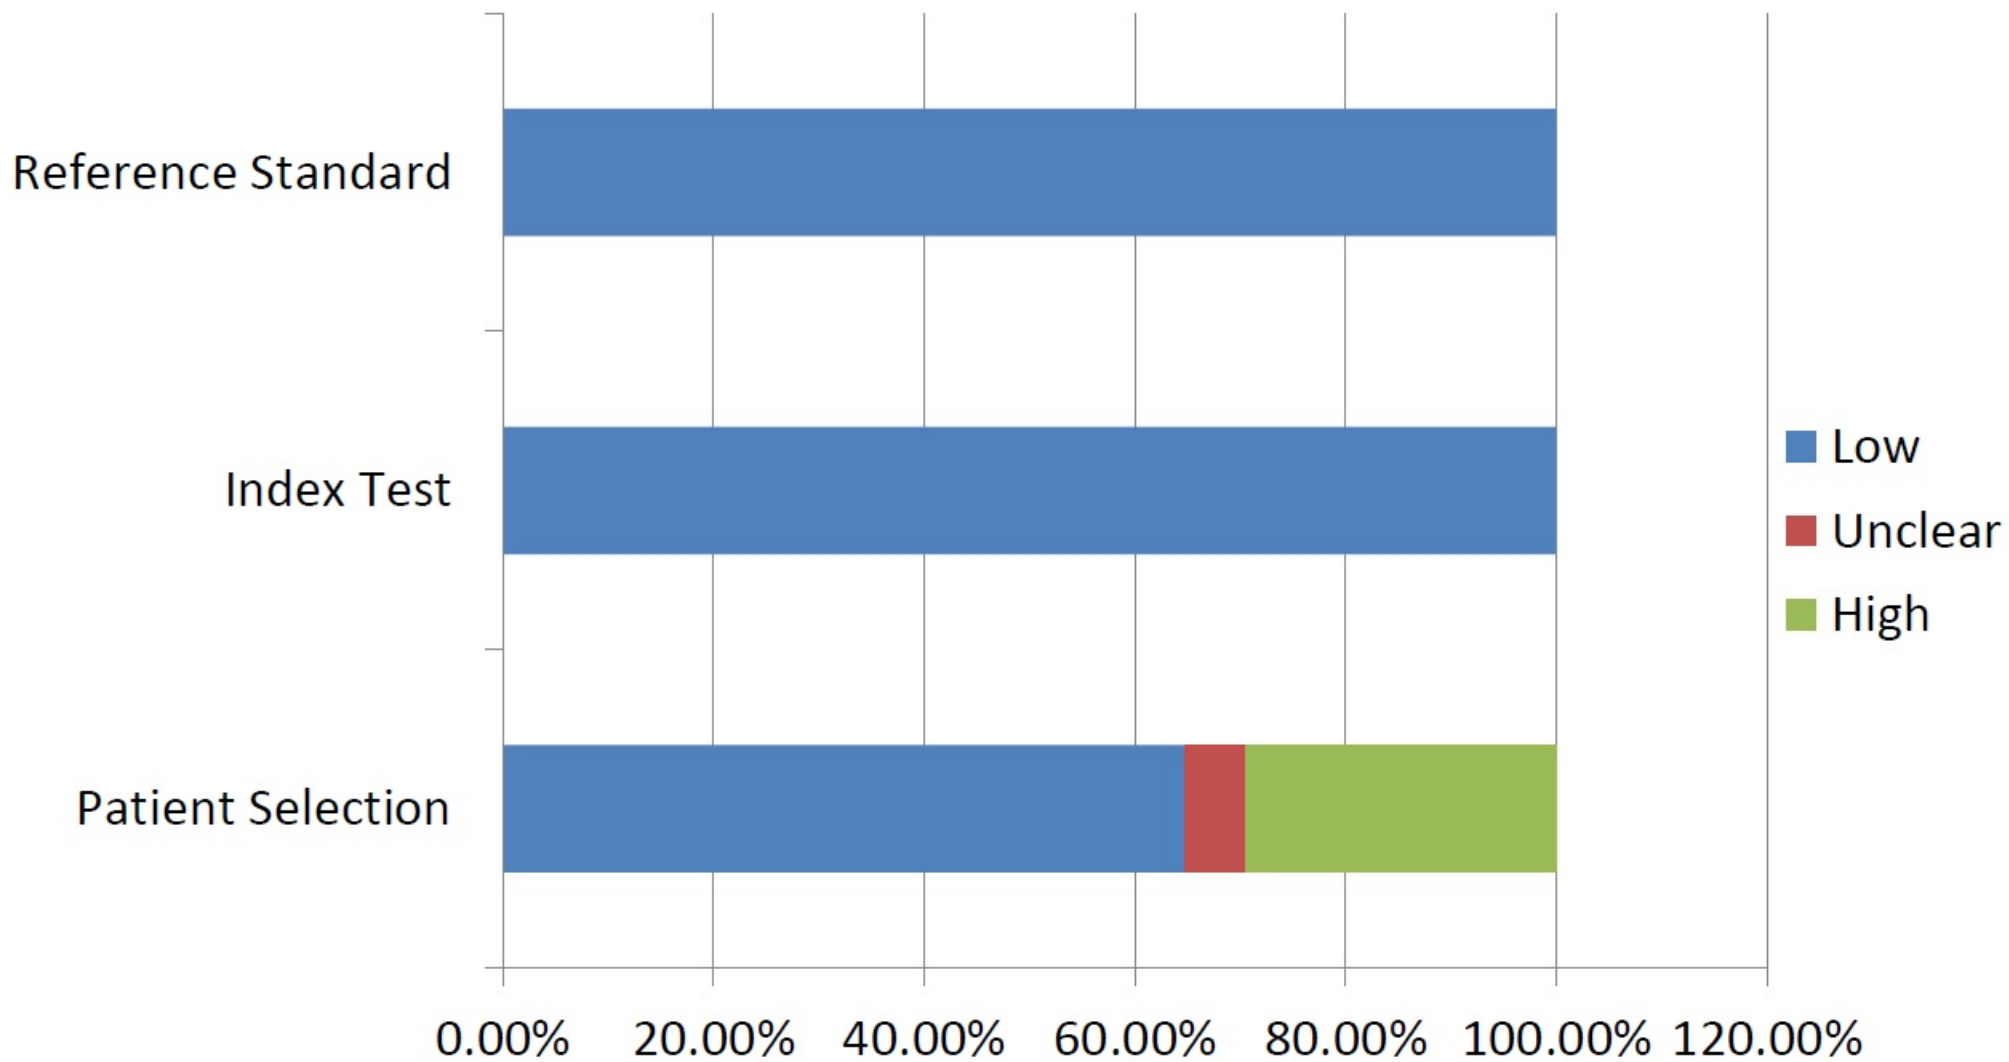

Figure S3 : QUADAS 2 DOMAIN- Graph for Applicability

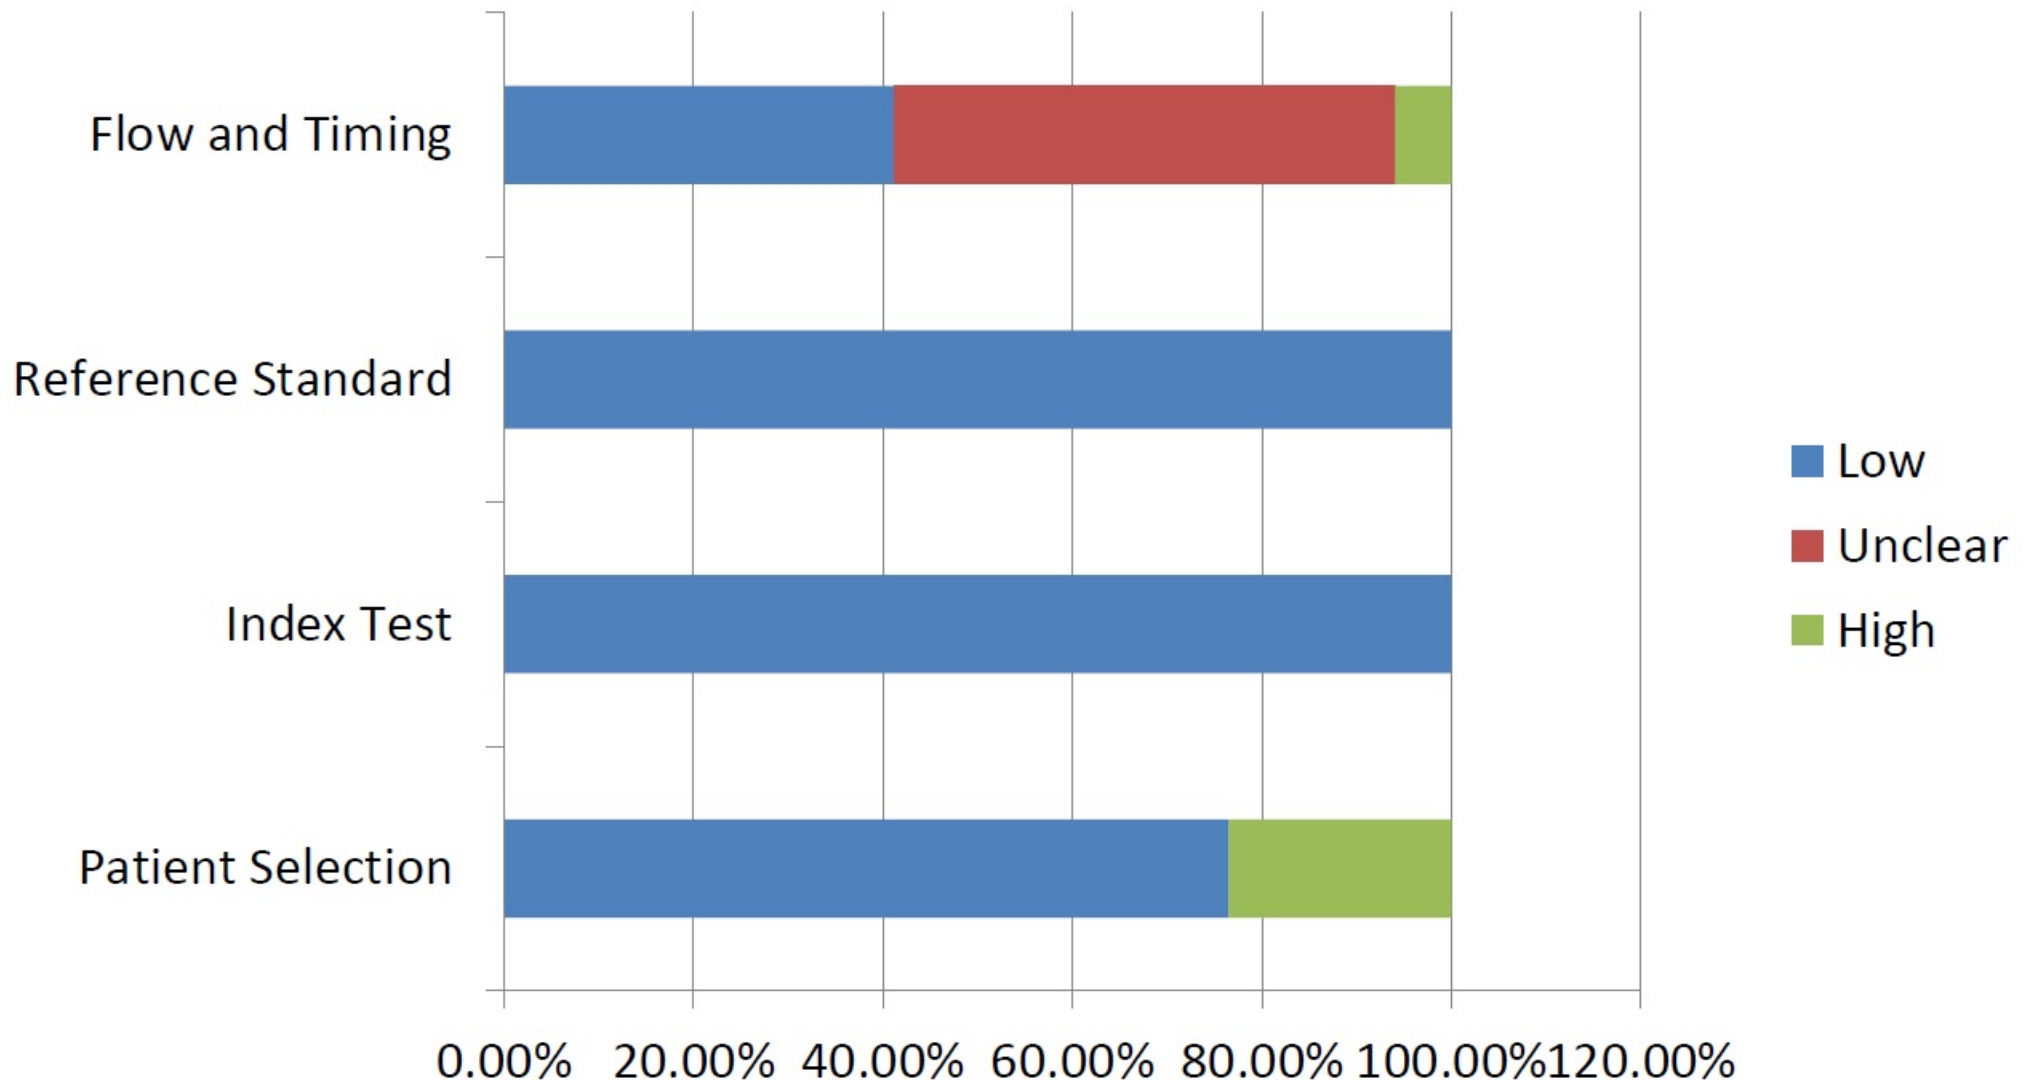

Figure S4: Patient Level Bayes Nomogram

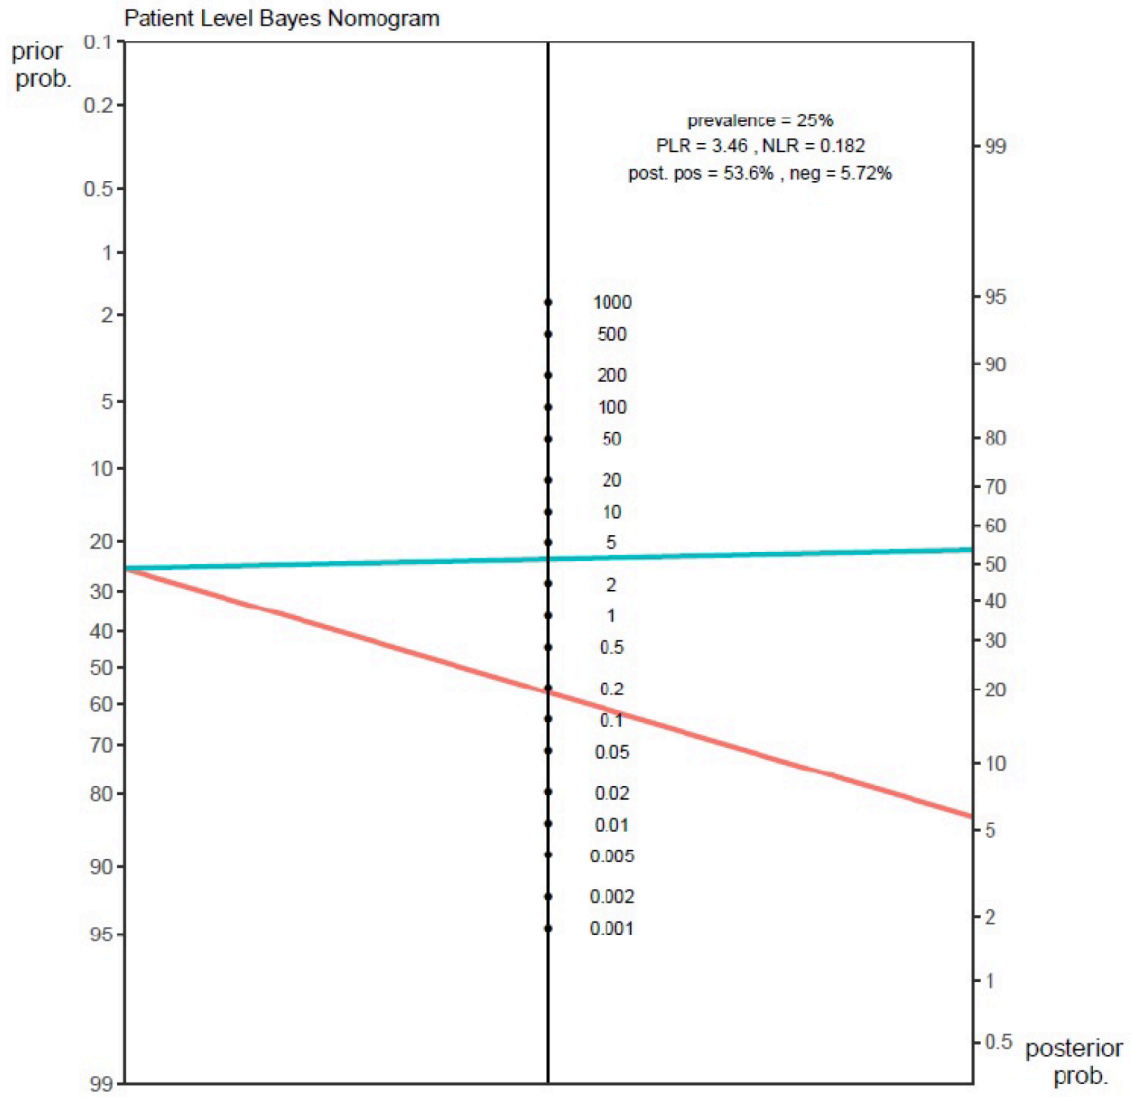

Figure S5: Individual Vessel Level Bayes Nomogram

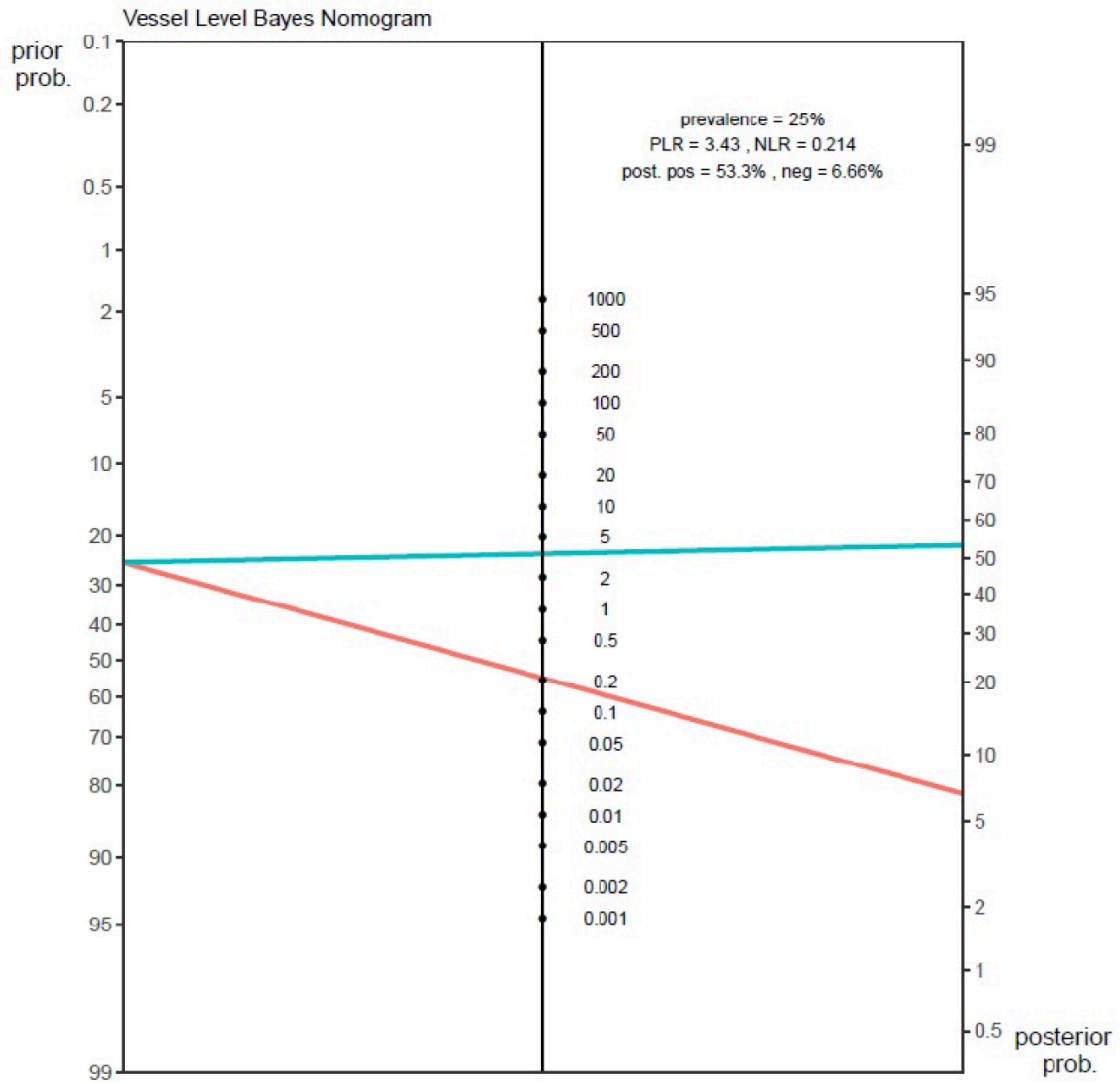

Supplement: 41598_2018_29910_MOESM1_ESM.pdf [file 41598_2018_29910_MOESM1_ESM.pdf]
